# Supplementary material for: Subtelomere-binding protein Tbf1 and telomere-binding protein Rap1 collaborate to inhibit localization of the Mre11 complex to DNA ends in budding yeast
Source: PubMed Central journal article supplement — Mol Biol Cell. 2012 Jan 15;23(2):347–59. doi: 10.1091/mbc.E11-06-0568 (PMC3258178; doi:10.1091/mbc.e11-06-0568), 2012-01-15
Supplement: supp_E11-06-0568_CombinedSupMats.pdf [file supp_E11-06-0568_CombinedSupMats.pdf]

## Legends to Supp. Figures

## Supplemental figures

## Fig. S1

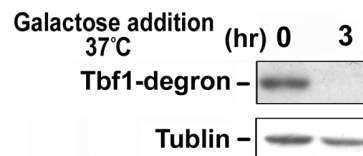**Supp. Fig. 1. *UBR1*-induced Tbf1 protein degradation in nocodazole arrested cells.**

*tbf1* degron mutant (*tbf1-d*) (KSC2853) cells were grown in sucrose at 30°C and synchronized at G2/M with nocodazole. After synchronization, the culture was incubated with galactose and concomitantly shifted to 37°C. Aliquots of cells were collected at the indicated times after incubation with galactose at 37°C and subjected to immunoblotting analysis with anti-myc antibodies.

## Supplemental figures

### Fig. S2

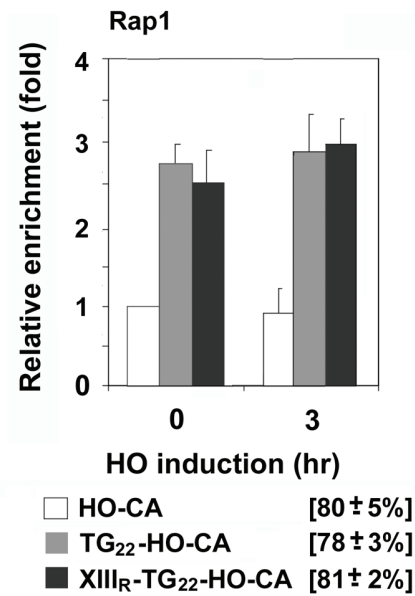

#### Supp. Fig. 2. Rap1 binding at the TG<sub>22</sub> sequence.

TG<sub>22</sub>-HO-CA (KSC2883), XIII<sub>R</sub>-TG<sub>22</sub>-HO-CA (KSC2884) or HO-CA (KSC2893) cells expressing HA-tagged Rap1 protein were transformed with the GAL-HO plasmid. Transformants were analyzed for Rap1 binding as in Fig. 1B.

## Supplemental figures

### Fig. S3

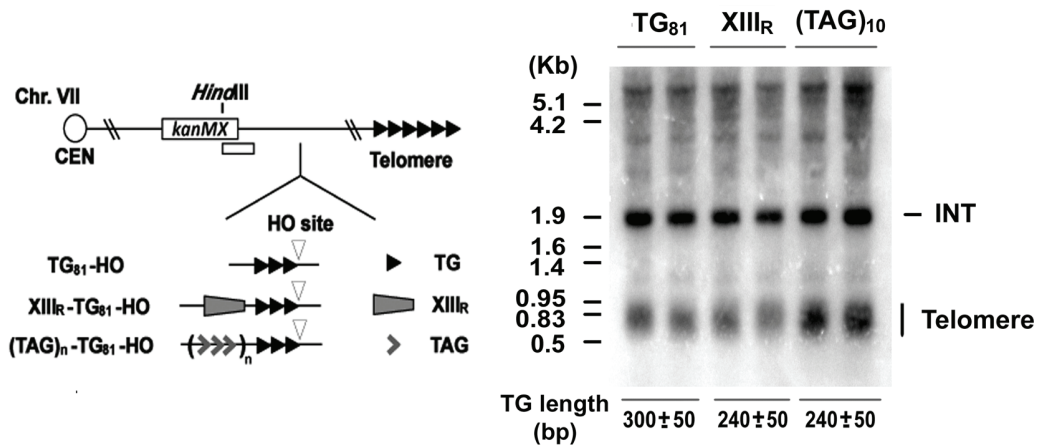

**Supp. Fig. 3. Telomere addition at  $TG_{81}$  ends with the subtelomeric  $XIII_R$  or 10XTTAGGG sequence.**  $TG_{81}$ -HO (KSC2214),  $XIII_R$ - $TG_{81}$ -HO (KSC2760) or  $TAG_{10}$ - $TG_{81}$ -HO (KSC2568) cells carrying the GAL-HO plasmid were grown in galactose for seven days after multiple dilutions. Genomic DNA was digested with *HindIII* and then analyzed by Southern blot using the  $^{32}P$ -labeled DNA fragment probe (white bar) (Hirano *et al.*, 2009). The band marked INT is derived from the *SMC2* locus and serves as a loading control.

**Table 1. Strains used in this study**

---

|         |                  |                                                                                                                                      |
|---------|------------------|--------------------------------------------------------------------------------------------------------------------------------------|
| KSC2214 | <i>MATa-inc</i>  | <i>VII-L::KanMX-TG<sub>8I</sub>-HO</i>                                                                                               |
| KSC2849 | <i>MATa-inc</i>  | <i>VII-L::KanMX-TG<sub>8I</sub>-HO MRE11-9myc::TRP1 TEL1-2HA::TRP1</i>                                                               |
| KSC2760 | <i>MATa-inc</i>  | <i>VII-L::KanMX-XIII<sub>R</sub>-TG<sub>8I</sub>-HO</i>                                                                              |
| KSC2850 | <i>MATa-inc</i>  | <i>VII-L::KanMX-XIII<sub>R</sub>-TG<sub>8I</sub>-HO MRE11-9myc::TRP1 TEL1-2HA::TRP1</i>                                              |
| KSC2851 | <i>MATa-inc</i>  | <i>VII-L::KanMX-HO MRE11-9myc::TRP1 TEL1-2HA::TRP1</i>                                                                               |
| KSC2852 | <i>MATa-inc</i>  | <i>VII-L::KanMX-XIII<sub>R</sub>-HO MRE11-9myc::TRP1 TEL1-2HA::TRP1</i>                                                              |
| KSC2853 | <i>MATa-inc</i>  | <i>VII-L::KanMX-XIII<sub>R</sub>-TG<sub>8I</sub>-HO <i>tbfl</i>-degron::ura3 <i>GAL-UBR1::HIS3</i></i>                               |
| KSC2854 | <i>MATa-inc</i>  | <i>VII-L::KanMX-XIII<sub>R</sub>-TG<sub>8I</sub>-HO MRE11-3HA::HphMX <i>tbfl</i>-degron::ura3 <i>GAL-UBR1::HIS3</i></i>              |
| KSC2855 | <i>MATa-inc</i>  | <i>VII-L::KanMX-XIII<sub>R</sub>-TG<sub>8I</sub>-HO TEL1-2HA::TRP1 <i>tbfl</i>-degron::ura3 <i>GAL-UBR1::HIS3</i></i>                |
| KSC2856 | <i>MATa-inc</i>  | <i>VII-L::KanMX-(TAG)<sub>2</sub>-TG<sub>8I</sub>-HO MRE11-9myc::TRP1 TEL1-2HA::TRP1</i>                                             |
| KSC2857 | <i>MATa-inc</i>  | <i>VII-L::KanMX-(TAG)<sub>4</sub>-TG<sub>8I</sub>-HO MRE11-9myc::TRP1 TEL1-2HA::TRP1</i>                                             |
| KSC2568 | <i>MATa-inc</i>  | <i>VII-L::KanMX-(TAG)<sub>10</sub>-TG<sub>8I</sub>-HO</i>                                                                            |
| KSC2858 | <i>MATa-inc</i>  | <i>VII-L::KanMX-(TAG)<sub>10</sub>-TG<sub>8I</sub>-HO MRE11-9myc::TRP1 TEL1-2HA::TRP1</i>                                            |
| KSC2859 | <i>MATa-inc</i>  | <i>VII-L::KanMX-(TAG)<sub>10</sub>-TG<sub>8I</sub>-HO MRE11-9myc::TRP1 TEL1-2HA::TRP1 <i>rif1Δ::ura3 rif2Δ::HphMX</i></i>            |
| KSC2860 | <i>MATa-inc</i>  | <i>VII-L::KanMX-(CTA)<sub>10</sub>-TG<sub>8I</sub>-HO MRE11-9myc::TRP1 TEL1-2HA::TRP1</i>                                            |
| KSC2861 | <i>MATa-inc</i>  | <i>VII-L::KanMX-lacO<sub>8</sub>-TG<sub>8I</sub>-HO MRE11-9myc::TRP1 TEL1-2HA::TRP1</i>                                              |
| KSC2862 | <i>MATa-inc</i>  | <i>VII-L::KanMX-lacO<sub>8</sub>-HO MRE11-9myc::TRP1 TEL1-2HA::TRP1</i>                                                              |
| KSC2863 | <i>MATa-inc</i>  | <i>VII-L::KanMX-lacO<sub>8</sub>-tetO<sub>4</sub>-HO MRE11-9myc::TRP1 TEL1-2HA::TRP1 <i>sir2Δ::LEU2</i></i>                          |
| KSC2864 | <i>MATa-inc</i>  | <i>VII-L::KanMX-lacO<sub>8</sub>-tetO<sub>4</sub>-HO MRE11-9myc::TRP1 TEL1-2HA::TRP1 <i>rif1Δ::ura3 rif2Δ::HphMX sir2Δ::LEU2</i></i> |
| KSC2505 | <i>MATa/MATa</i> | <i>TBF1/tbflΔ:: HphMX</i>                                                                                                            |
| KSC1602 | <i>MATa</i>      | <i>GAL-UBR1::HIS3</i>                                                                                                                |
| KSC2756 | <i>MATa</i>      | <i>tbfl</i> -degron::KanMX <i>GAL-UBR1::HIS3</i>                                                                                     |

KSC2867 **MATa** *tbfl-degtron::KanMX GAL-UBR1::HIS3 est1A::ura3 [YCpU-EST1]*  
 KSC2865 **MATa-inc** *VII -L::KanMX-lacO<sub>8</sub>-TG<sub>81</sub>-HO tbfl-degtron::ura3 GAL-UBR1::HIS3 MRE11-3HA::HphMX*  
 KSC2866 **MATa-inc** *VII -L::KanMX-lacO<sub>8</sub>-TG<sub>81</sub>-HO tbfl-degtron::ura3 GAL-UBR1::HIS3 TEL1-2HA::TRP1*  
 KSC2891 **MATa** *tbfl-degtron::KanMX GAL-UBR1::HIS3 stn1-13::URA3*  
 KSC2230 **MATa-inc** *VII -L::KanMX-TG<sub>22</sub>-HO-CA*  
 KSC2901 **MATa-inc** *VII -L::KanMX-TG<sub>22</sub>-HO-CA MRE11-9myc::TRP1*  
 KSC2895 **MATa-inc** *VII -L::KanMX-TG<sub>22</sub>-HO-CA TEL1-2HA::TRP1*  
 KSC2898 **MATa-inc** *VII -L::KanMX-TG<sub>22</sub>-HO-CA MEC1-2HA::LEU2*  
 KSC2834 **MATa-inc** *VII -L::KanMX-XIII<sub>R</sub>-TG<sub>22</sub>-HO-CA*  
 KSC2892 **MATa-inc** *VII -L::KanMX-XIII<sub>R</sub>-TG<sub>22</sub>-HO-CA MRE11-9myc::TRP1*  
 KSC2896 **MATa-inc** *VII -L::KanMX-XIII<sub>R</sub>-TG<sub>22</sub>-HO-CA TEL1-2HA::TRP1*  
 KSC2899 **MATa-inc** *VII -L::KanMX-XIII<sub>R</sub>-TG<sub>22</sub>-HO-CA MEC1-2HA::LEU2*  
 KSC2836 **MATa-inc** *VII -L::KanMX-XIII<sub>R</sub>-TG<sub>22</sub>-HO-CA tbfl-degtron::URA3 GAL-UBR1::HIS3*  
 KSC2839 **MATa-inc** *VII -L::KanMX-XIII<sub>R</sub>-TG<sub>22</sub>-HO-CA GAL-UBR1::HIS3*  
 KSC2894 **MATa-inc** *VII -L::KanMX-XIII<sub>R</sub>-HO-CA*  
 KSC2905 **MATa-inc** *VII -L::KanMX-XIII<sub>R</sub>-HO-CA MRE11-9myc::TRP1*  
 KSC2897 **MATa-inc** *VII -L::KanMX-XIII<sub>R</sub>-HO-CA TEL1-2HA::TRP1*  
 KSC2900 **MATa-inc** *VII -L::KanMX-XIII<sub>R</sub>-HO-CA MEC1-2HA::LEU2*  
 KSC2883 **MATa-inc** *VII -L::KanMX-TG<sub>22</sub>-HO-CA RAP1-6HA::TRP1*  
 KSC2884 **MATa-inc** *VII -L::KanMX-XIII<sub>R</sub>-TG<sub>22</sub>-HO-CA RAP1-6HA::TRP1*  
 KSC2893 **MATa-inc** *VII -L::KanMX-HO-CA RAP1-6HA::TRP1*

---

All the strains are isogenic and derived from KSC006 (**MATa** *ade1 his2 leu2 trp1 ura3*)(Wakayama *et al.*, 2001). **MATa-inc** is a mutation of the HO cleavage site (Sweetser *et al.*, 1994).

Table 2. List of oligonucleotides used in this study

| Name   | Sequence                                                                                                                              |
|--------|---------------------------------------------------------------------------------------------------------------------------------------|
| KSX006 | 5'-AATTAACCCTCACTAAAGGGAAC-3'                                                                                                         |
| KSX007 | 5'-TAATACGACTCACTATAGGGCGA-3'                                                                                                         |
| KS1255 | 5'-GTTAAGCTTGCCTCGTCCCCGC-3'                                                                                                          |
| KS1311 | 5'-GCAACCAGTATAATTGAGGCTGC-3'                                                                                                         |
| KS1312 | 5'-GCTGTGATTGATACTAACGCC-3'                                                                                                           |
| KS1679 | 5'-GAGAGTAGAGGTAGATGTGCAATTGTGTGT-3'                                                                                                  |
| KS1744 | 5'-GTTGTTTCTGAAACATGGCAAAGG-3'                                                                                                        |
| KS1745 | 5'-CAACCAAACCGTTATTCATTCGTG-3'                                                                                                        |
| KS1746 | 5'-AAAGAATTCAAATGTGAGCGGATAACAATTAATGTGAGCGAGTA<br>ACAACCGGCAGTGAGCGCAACGCAATTAATTGTGAGCGCTCACA<br>ATTCAATTGTCTCTCACATCTACCTCTACTC-3' |
| KS1747 | 5'-AAAGAGCTCAAATCACCGCGGGGCAACCTTTCTCTTCTTCTT TGG-3'                                                                                  |
| KS1756 | 5'-AAAGTCGACATGGTGAATATGTAACGTTATACG-3'                                                                                               |
| KS2037 | 5'-AAAGACTGAGCTGAATGAAGTCTC-3'                                                                                                        |
| KS2038 | 5'-CGTCTGAGAATCTTGAACAACAAC-3'                                                                                                        |
| KS2091 | 5'-AAACCGCGGATGGATTCGCAAGTGCC-3'                                                                                                      |
| KS2092 | 5'-AAAGAGCTCACCAGA AATGAACGTGACG-3'                                                                                                   |
| KS2110 | 5'-AAAGGATCCTCAGTTATTAGAAGCCCCAAAAGAGC-3'                                                                                             |
| KS2324 | 5'-AAAGAATTCCCTAACCCCTAACCCCTAACCCCTAACTCTCACATCTAC<br>CTCTACTC-3'                                                                    |
| KS2325 | 5'-AAAGAATTCCCTAACCCCTAACTCTCACATCTACCTCTACTC-3'                                                                                      |
| KS2327 | 5'-AAAGAATTCTTAGGGTTAGGGTTAGGGTTAGGGTTAGGGTTAGG<br>GTTAGGGTTAGGGTTAGGGTTAGGG CTCTCACATCTACCTCTAC<br>TC-3'                             |

KS2330 5'-GCCAAGCTTGCATGCCTGCAGGTCGACGGTAAGGGCTCCAGC  
C-3'

KS2331 5'-GAATTCGAGCTCGGTACCCGGGGATCCGTGAAAGGGAGCGTG  
GA-3'

KS2335 5'-CATCATCACCATCACCACGATTAT-3'

KS2336 5'-ATCTTTATAATCGTGGTGATGGTGATGATGATCCATGACAAATGG  
GGA AAG-3'

KS2337 5'-ATTACGCGTATCCTTATGACGTACCAGATTATGCGGATTCGCAA  
GTGCCCAA-3'

KS2338 5'-GATACGCGTAATCTGGAACATCGTATGGATAATCCATGACAAATG  
GGGAAAG-3'

KS2438 5'-ATCGGATCCTCTAGATAGGGTAGGGTTAGGGTAGGGTTAGGGTAG  
TGTTAGGGTGGAATTCGAA-3'

KS2439 5'-TTCGAATTCCACCCTAACACTACCCTAACCTACCCTAACCTAC  
CCTATCTAGAGGATCCGAT-3'

KS2446 5'-GGAGTTGGGAAACCATAAAC-3'

KS2492 5'-GTGGCGCCTGGTTTATGGTTTCCCAACTCCGCTTACATTGCCGGC  
TTGAAA-3'

KS2497 5'-GGAAAGTTTGCGAAATCGGCGGCTATCCTATATCTTGAT-3'

KS2498 5'-TAGGATAGCCGCCGATTTGCGAAACTTTCCGCTTTGTTTC-3'

KS2503 5'-TATCTTGATGCGAAAACAGCGGCTTACATTGCCGGCTTG-3'

KS2504 5'-AATGTAAGCCGCTGTTTTCGCATCAAGATATAGGATAGC-3'

KS2577 5'-ATAGAATTCCCCCTGACCCACACCCACACCCACACACTCTTCC  
ACCCTAACACTAC-3'
